# Supplementary material for: Evaluation of a Salmonella Strain Isolated from Honeybee Gut as a Potential Live Oral Vaccine Against Lethal Infection of Salmonella Typhimurium
Source: PubMed Central journal article supplement — Pol J Microbiol. 2019 May 31;68(2):173–83. doi: 10.33073/pjm-2019-017 (PMC7260634; doi:10.33073/pjm-2019-017), 2019-05-31
Supplement: pjm-68-2-173_Supplementary.pdf [file pjm-68-2-173_Supplementary.pdf]

Supplementary materials: for the article:

**Zafar H. et al.** Evaluation of a *Salmonella* Strain Isolated from Honeybee Gut as a Potential Live Oral Vaccine Against Lethal Infection of *Salmonella* Typhimurium

Pol J Microbiol. 2019. Article in Press.

Table SI

The details of the safety evaluation test.

Group SR1

| Antigen          | Post vaccination Hours | Results based on the average of readings of five rabbits |                          |                   |              |        |                                |
|------------------|------------------------|----------------------------------------------------------|--------------------------|-------------------|--------------|--------|--------------------------------|
|                  |                        | Physical abnormalities                                   | Average body temperature | Daily food intake | Water intake | Weight | Recovery of HB1 antigen CFU/ml |
| HB1 live antigen | 24                     | None                                                     | 102.9                    | Normal            | Normal       | Normal | $1 \times 10^3$                |
|                  | 48                     | -                                                        | 102.5                    | Dropped           | Dropped      | Normal | $1 \times 10^4$                |
|                  | 72                     | -                                                        | 103.1                    | Normal            | Normal       | Normal | $1 \times 10^4$                |
|                  | 96                     | -                                                        | 102.5                    | Normal            | Normal       | Normal | $1 \times 10^5$                |
|                  | 120                    | -                                                        | 103.1                    | Normal            | Normal       | Normal | $1 \times 10^5$                |
|                  | 144                    | -                                                        | 101.6                    | Normal            | Normal       | Normal | $1 \times 10^4$                |
|                  | 168                    | -                                                        | 102.2                    | Normal            | Normal       | Normal | $1 \times 10^4$                |

Group SR2

| Antigen          | Post vaccination hours | Results based on the average of readings of five rabbits |                          |             |              |                   |                                          |
|------------------|------------------------|----------------------------------------------------------|--------------------------|-------------|--------------|-------------------|------------------------------------------|
|                  |                        | Physical abnormalities                                   | Average body Temperature | Food intake | Water Intake | Changes in weight | Recovery of HB1 antigen CFU/ml (Average) |
| HB1 live antigen | 24                     | None                                                     | 103.2                    | Normal      | Normal       | Normal            | $1 \times 10^5$                          |
|                  | 48                     | -                                                        | 102.9                    | Normal      | Normal       | Normal            | $1 \times 10^8$                          |
|                  | 72                     | -                                                        | 102.5                    | Normal      | Normal       | Normal            | $1 \times 10^8$                          |
|                  | 96                     | -                                                        | 102.7                    | Normal      | Normal       | Normal            | $1 \times 10^7$                          |
|                  | 120                    | -                                                        | 102.1                    | Normal      | Normal       | Normal            | $1 \times 10^7$                          |
|                  | 144                    | -                                                        | 101.9                    | Normal      | Normal       | Normal            | $1 \times 10^6$                          |
|                  | 168                    | -                                                        | 102.5                    | Normal      | Normal       | Normal            | $1 \times 10^7$                          |

Group SR3 (control)

| Antigen          | Post vaccination Hours | Results based on the average of readings obtained from of the five rabbits |                          |             |              |                   |                                |
|------------------|------------------------|----------------------------------------------------------------------------|--------------------------|-------------|--------------|-------------------|--------------------------------|
|                  |                        | Physical abnormalities                                                     | Average body Temperature | Food intake | Water Intake | Changes in weight | Recovery of HB1 antigen CFU/ml |
| HB1 live antigen | 24                     | None                                                                       | 100.7                    | Normal      | Normal       | Normal            | -                              |
|                  | 48                     | -                                                                          | 102.0                    | Normal      | Normal       | Normal            | -                              |
|                  | 72                     | -                                                                          | 102.1                    | Normal      | Normal       | Normal            | -                              |
|                  | 96                     | -                                                                          | 102.5                    | Normal      | Normal       | Normal            | -                              |
|                  | 120                    | -                                                                          | 102.3                    | Normal      | Normal       | Normal            | -                              |
|                  | 144                    | -                                                                          | 102.4                    | Normal      | Normal       | Normal            | -                              |
|                  | 168                    | -                                                                          | 102.3                    | Normal      | Normal       | Normal            | -                              |

**Table SII**  
Table for determination of LD50 of *S. Typhimurium* (ATCC 14028).

| Groups | Dilution of bacteria | Dose cells        | Observed values |       | Accumulative values |             | Rates            |               |
|--------|----------------------|-------------------|-----------------|-------|---------------------|-------------|------------------|---------------|
|        |                      |                   | Dead            | Alive | Total dead          | Total alive | Fractional ratio | Percent ratio |
| 1      | 10 <sup>-2</sup>     | 1×10 <sup>6</sup> | 6/6             | 0/6   | 15                  | 0           | 15/15            | 100%          |
| 2      | 10 <sup>-3</sup>     | 1×10 <sup>5</sup> | 4/6             | 2/6   | 9                   | 2           | 9/11             | 80%           |
| 3      | 10 <sup>-4</sup>     | 1×10 <sup>4</sup> | 3/6             | 3/6   | 5                   | 5           | 5/10             | 50%           |
| 4      | 10 <sup>-5</sup>     | 1×10 <sup>3</sup> | 1/6             | 5/6   | 2                   | 10          | 2/12             | 16%           |
| 5      | 10 <sup>-6</sup>     | 1×10 <sup>2</sup> | 1/6             | 5/6   | 1                   | 15          | 1/16             | 6%            |
| 6      | 10 <sup>-7</sup>     | 1×10 <sup>1</sup> | 0/6             | 6/6   | 0                   | 21          | 0/21             | 0             |
| 7      | PBS                  |                   | 0/6             | 6/6   | 0                   | 27          | 0/27             | 0             |

No of rabbits in each group was 6, while total rabbits were 42.

The percentage of mortality was calculated according to the method of Reed and Munch, (1938). Proportional distance = % mortality above 50% - 50% / % mortality above 50% - mortality below 50% . The LD50 of *S. Typhimurium* (ATCC14028) was considered to be 1×10<sup>4</sup> cfu/ml.

**Table SIII**  
Results of Challenge/Protection test against *S. Typhimurium* applied at 70 days post immunization.

| Vaccinated groups | No. of animals challenged | Morbidity | Survival | Percentage protection |
|-------------------|---------------------------|-----------|----------|-----------------------|
| R1                | 10                        | 3         | 7/10     | 70                    |
| R2                | 10                        | 0         | 10/10    | 100                   |
| R3                | 10                        | 2         | 2/10     | 80                    |
| R4                | 10                        | 0         | 10/10    | 10                    |

## Appendix A

The recovery percentage of isolates from the human, animal and insect enteric sources.

| Type of sample                                       | Species                    | No. of samples | Growth in TTB | <i>Salmonella</i> colonies on SSA/BSA | Total <i>Salmonella</i> isolates |
|------------------------------------------------------|----------------------------|----------------|---------------|---------------------------------------|----------------------------------|
| Stool/ feces/<br>dropping/<br>insect gut<br>contents | Human<br>TY(1-15)          | 15             | 4(26.6%)      | 3(20%)                                | 3(20%)<br>TY1, TY2 TY3           |
|                                                      | Cat<br>CT (1-15)           | 15             | 3(20%)        | 1(6.6%)                               | 1(6.6%)<br>CT7                   |
|                                                      | Sheep<br>SP (1-15)         | 15             | 3(20%)        | 1(6.6%)                               | 1(6.6%)<br>SP6                   |
|                                                      | Honey bee<br>HB (1-15)     | 15             | 5(33.3%)      | 2(13.3%)                              | 2(13.3%)<br>HB1, HB11            |
|                                                      | Poultry birds<br>PB (1-15) | 15             | 4(26.6%)      | 2(13.3%)                              | 2(13.3%)<br>PB2, PB9             |
|                                                      | Horse<br>HE (1-15)         | 15             | 1(6.6%)       | 1(6.6%)                               | 1(6.6%)<br>HE13                  |
| Total                                                |                            | 90             | 20(22.2%)     | 10(11.1%)                             | 10(11.1%)                        |

TTB = Tetrathionate broth,  
SSA = *Salmonella-Shigella* agar  
BSA =Bismuth-Sulphite agar

## Appendix B

### Colony morphology of *Salmonella* isolates.

| Isolate | SSA                                |                | BSA                       |                |
|---------|------------------------------------|----------------|---------------------------|----------------|
|         | Morphology                         | Diameter range | Morphology                | Diameter range |
| TY1     | Straw colored with blackish center | 0.9-1.5 mm     | Black colored             | 0.8-1.5 mm     |
| TY2     | Straw colored with blackish center | 0.8-1.5mm      | Black colored             | 0.75- 1mm      |
| TY3     | Straw colored with blackish center | 0.75-1 mm      | Black colored             | 0.75-1.5 mm    |
| CT 7    | Straw colored with blackish center | 0.5-0.75 mm    | Black colored             | 0.5-1mm        |
| SP 6    | Straw colored with blackish center | 0.9-1 mm       | Circular<br>Straw color   | 0.5-1.5 mm     |
| HB 1    | Straw colored with blackish center | 0.8-1mm        | Circular<br>Straw colored | 0.75-1.5 mm    |
| HB 11   | Straw colored with blackish center | 0.7- 1mm       | Circular<br>Straw colored | 0.9-1 mm       |
| PB 2    | Straw colored with blackish center | 0.8-1 mm       | Circular<br>Straw colored | 0.8- 1.5mm     |
| PB 9    | Straw colored with blackish center | 0.6-0.75 mm    | Circular<br>Straw colored | 0.5-1 mm       |
| HE 13   | Straw colored with blackish center | Up to 1mm      | Circular<br>Straw colored | 0.9-1.5 mm     |

## Appendix C

### Fasta sequence of TY1 (Accession# MH985341) alongwith top 4 hits from BLAST.

>TY1

```
CTCGAGCTACCATGCACTCAACGGTAACAGGAAGCACTTGCTGCTTTGCT
GACGAGTGGCGGACGGGTGAGTAGTGTCTGGGAAACTGCCTGATGGAGGG
GGATAACTACTGGAAACGGTGGCTAATACCGCATAACGTCGCAAGACCAA
AGAGGGGGACCTTCGGGCCTCTTGCCATCATATGTGCCCATATGGGATTA
TCTTGTTGGTGAGGTAACGGCTCACCTGGGCGACGATCCCTATCTGGTCT
GAGAGGATGACCACCCACACTGGAAGTGGAGACACGGTCCACACTCCTACG
GGAGGCAGCAGTGGGGAATATTGCACAGTGGGCGCAAGCCTGATGCACCC
ATGCCGCGTGTATGAAAAAGGCCTTCGGGTTGTAAAGTACTTTCAGCGGG
GAAGAAGGTGTTGTGGTTAATAACCGCAGCAATTGACGTTACCCGCAAAA
GAAGCACCGGCTAACTCCGTGCCAGCACCCGCGGTAATACGGAGGGTGCA
AGCGTTAATCGGAATTACTGGGCGTAAAGCGCACGCACGCGGTCTGTCAA
GTCAGATGTGATATCCCCGGTCTCAACCTGAGAAGTGCATTCGAAACTGG
CAGGCTTGAGTCTTGTAGAGGGGGGTAGAATTCCGGGTGTAGCGGTGATA
TGCGTAGAGATCTGGAGGAATACCGGTGGCGAGCGCGGCCCTGCACAAG
ACTGACGCTCATGTGCGAAGCGTGGAGAGCAACAGGATTAGATCCTCTGA
TACTCACGCCGTACACGATGTCTACGTGAGTTGTGCCGTGACGCGTGCTC
AGAGCTAACGCGTAAGTACACCCGCCTGGAGAAGCTACGGGCCCGAC
```

Descriptions

Sequences producing significant alignments:

Select: All None Selected: 0

Alignments Download GenBank Graphics Distance tree of results

| Description                                                                                                                          | Max score | Total score | Query cover | E value | Ident | Accession                   |
|--------------------------------------------------------------------------------------------------------------------------------------|-----------|-------------|-------------|---------|-------|-----------------------------|
| <input type="checkbox"/> <a href="#">Salmonella enterica subsp. enterica strain Ty2 16S ribosomal RNA, partial sequence</a>          | 1236      | 1236        | 98%         | 0.0     | 93%   | <a href="#">NR_074799.1</a> |
| <input type="checkbox"/> <a href="#">Salmonella enterica subsp. enterica strain LT2 16S ribosomal RNA gene, partial sequence</a>     | 1230      | 1230        | 98%         | 0.0     | 93%   | <a href="#">NR_104709.1</a> |
| <input type="checkbox"/> <a href="#">Salmonella enterica subsp. salamae strain DSM 9220 16S ribosomal RNA gene, partial sequence</a> | 1227      | 1227        | 98%         | 0.0     | 93%   | <a href="#">NR_044372.1</a> |
| <input type="checkbox"/> <a href="#">Salmonella enterica subsp. enterica strain LT2 16S ribosomal RNA, partial sequence</a>          | 1225      | 1225        | 98%         | 0.0     | 93%   | <a href="#">NR_074910.1</a> |

### FASTA sequence of TY2 (Accession# MH985355) alongwith top 4 hits from BLAST.

>TY2

```
CTCGAGCTACCATGCACTCAACGGTAACAGGAAGCACTTGCTGCTTTGCT
GACGAGTGGCGGACGGGTGAGTAGTGTCTGGGAAACTGCCTGATGGAGGG
GGATAACTACTGGAAACGGTGGCTAATACCGCATAACGTCGCAAGACCAA
AGAGGGGGACCTTCGGGCCTCTTGCCATCATATGTGCCCATATGGGATTA
TCTTGTTGGTGAGGTAACGGCTCACAGGGCGACGATCCCTATCTGGTCT
GAGAGGATGACCACCCACACTGGAAGTGGAGACACGGTCCACACTCCTACG
GGAGGCAGCAGTGGGGAATATTGCACAGTGGGCGCAAGCCTGATGCACCC
ATGCCGCGTGTATGAAAAAGGCCTTCGGGTTGTAAAGTACTTTCAGCGGG
GAAGAAGGTGTTGTGGTTAATAACCGCAGCAATTGACGTTACCCGCAAAA
GAAGCACCGGCTAACTCCGTGCCAGCACCCGCGGTAATACGGAGGGTGCA
AGCGTTAATCGGAATTACTGGGCGTAAAGCGCACGCACGCGGTCTGTCAA
GTCAGATGTGATATCCCCGGTCTCAACCTGAGAAGTGCATTCGAAACTGG
CAGGCTTGAGTCTTGTAGAGGGGGGTAGAATTCCGGGTGTAGCGGTGATA
TGCGTAGAGATCTGGAGGAATACCGGTGGCGAGCGCGGCCCTGCACAAG
ACTGACGCTCATGTGCGAAGCGTGGAGAGCAACAGGATTAGATCCTCTGA
TACTCACGCCGTACACGATGTCTACGTGAGTTGTGCCGTGACGCGTGCTC
```

AGAGCTAACGCGTAAGTACACCCGCCTGGAGAAGCTACGGGCCCGAC

Sequences producing significant alignments:

Select: All None Selected: 0

Alignments Download GenBank Graphics Distance tree of results

| Description                                                                                                                                             | Max score | Total score | Query cover | E value | Ident | Accession                  |
|---------------------------------------------------------------------------------------------------------------------------------------------------------|-----------|-------------|-------------|---------|-------|----------------------------|
| <input type="checkbox"/> <a href="#">Salmonella typhi strain RG-07/06 16S ribosomal RNA gene, partial sequence</a>                                      | 1197      | 1197        | 100%        | 0.0     | 95%   | <a href="#">EF195174.1</a> |
| <input type="checkbox"/> <a href="#">Salmonella enterica subsp. enterica serovar Typhi strain S.typhi Hk.4 16S ribosomal RNA gene, partial sequence</a> | 782       | 782         | 72%         | 0.0     | 92%   | <a href="#">KX946133.1</a> |
| <input type="checkbox"/> <a href="#">Pseudomonas fluorescens strain GB6 16S ribosomal RNA gene, partial sequence</a>                                    | 588       | 588         | 74%         | 1e-163  | 86%   | <a href="#">KR058828.1</a> |
| <input type="checkbox"/> <a href="#">Serratia marcescens subsp. sakuensis strain LO7 16S ribosomal RNA gene, partial sequence</a>                       | 568       | 568         | 74%         | 1e-157  | 85%   | <a href="#">MG198695.1</a> |

**FASTA sequence of TY3 (Accession# MH989533) alongwith top 4 hits from BLAST.**

>TY3

```
TCTCGAGCTCCATGCACTCAACGGTAACAGGAAGCACTTGCTGCTTTGCT
GACGAGTGGCGGACGGGTGAGTAGTGTCTGGGAATCTGCCTGATGGAGGG
GGATAACTACTGGAAACGGTGGCTAATACCGCATAACGTCGCAAGACCAA
AGAGGGGGACCTTCGGGCCTCTTGCCCTCATATGTGCCCATATGGGATTA
TCTTGTGTTGGTGAAGTAACGGCTCACCAGGGCGACTATCCCTATCTGGTCT
GAGAGGATGACCACCACTCTGGAAGTGAAGACACGGTCCACACTCCTACG
GGAGGCAGCAGTGGGGAATATTGCACAATGGGCGCAAGCCTGATGCACCC
ATGCCGCGTGTATGAAAAGGCCTTCGGGTTGTAAAGTACTTTCCGCGGG
GAGGAAGGTGTTGTGTTTAATAACCGCAGCATTGACGTTACCCGCAAAA
AAAACACCCGCTATCTCCGTGCCAGCACCCGCGGAAATACAGAGGGTGCA
AGCGTTTATCAGAATTTCTGGGGCGTAAAGCGCACGCACGCGCTCTGTCA
AGTCAGATGTGAAATCCCCCGGGCCTCCCCCTGGGGAAGTGCATTCTAAA
CTGGCAGGCTTGAGTCTTGTAAGGGGGGGTAAAAATTCCATGTGTAGCG
GTGAAATGCGTAGAGATCTGGAAGAATACCGGTGGCGAAAGCGGCCCCCT
GCGACAAAGACTGACGCTCCTGTGCGAAAGCGTGAGAGCACACAAGTATA
TATACCTCCTGAGTGCTCCACGCGTAAAGATGTACTACATTAGAGTTGT
GCCCTTAGAGGCGTGTCTTCCGGATCATAACGCTTTTATATACACCCCGC
TCTTGGGAGTGT
```

Sequences producing significant alignments:

Select: All None Selected: 0

Alignments Download GenBank Graphics Distance tree of results

| Description                                                                                                              | Max score | Total score | Query cover | E value | Ident | Accession                  |
|--------------------------------------------------------------------------------------------------------------------------|-----------|-------------|-------------|---------|-------|----------------------------|
| <input type="checkbox"/> <a href="#">Salmonella typhi strain AK-1 16S ribosomal RNA gene, partial sequence</a>           | 1286      | 1286        | 100%        | 0.0     | 95%   | <a href="#">DQ480723.1</a> |
| <input type="checkbox"/> <a href="#">Uncultured Citrobacter sp. clone bsc55 16S ribosomal RNA gene, partial sequence</a> | 1284      | 1284        | 99%         | 0.0     | 95%   | <a href="#">KC011154.1</a> |
| <input type="checkbox"/> <a href="#">Citrobacter freundii strain 58 16S ribosomal RNA gene, partial sequence</a>         | 1279      | 1279        | 99%         | 0.0     | 95%   | <a href="#">MH399241.1</a> |
| <input type="checkbox"/> <a href="#">Citrobacter freundii strain B9-C2 chromosome</a>                                    | 1279      | 10135       | 99%         | 0.0     | 95%   | <a href="#">CP027849.1</a> |

**Fasta sequence of HB1 (Accession #MH985334) alongwith top 4 hits from BLAST.**

>HB1

```
CCTGGCTCAGATTGAACGCTGGCGGCAGGCCTAACACATGCATGTCGAAC
GGTAACAGGAAGCAGCTTGCCTCTTCGCTGACGAGTGGCGGACGGGTGAG
TAATGTCTGGGAAACTGCCTGATGGAGGGGGATAACTACTGGAAACGGTA
GCTAATACAGCATAATGTTCGCAGGACCAAGAGGGGGACCTTCGGGCCTC
TTGCCATCAGATGTGCCTAGATGGGATTAGCTTGTGTTGGTGAAGTAAACGGC
TCACCAAGGCGACGATCCTTAGCTGGTCTGAGATGATGACCAGCCACACT
GGAAGTGAAGACACGGTCCAGACTCCTACGGGAGGCAGCAGTGCCCAATAT
TCTACTTATTTTTCAACCCTCATCCAGGGATGCAGCGTGTATGAAGAAGG
CCTTCGGGTCGGATTGTACTGGCAGCGCCGTGGTTGGGGATTTGGCTTAT
```

AACCTTGTTTCATTGACGATGGGCGCAGAAGAAGCACCCGGCTAACTCAGTG  
 CCAGCAGCCGCGGTAATACGGAAGGTGCAAGCGTTAATCGGAATTACTGG  
 GCGTAAAGCGCACGCCGGCGGTCTGTCAAGTTCGGATGTGAAATCCCCGGG  
 CTCAACCTGGGAACTGCATTCGAAACTGGCGGGCTGGAGTCTTGTAGAGG  
 GGGGTAGAATTCCAGGTGTAGCGGTGAAATGCGTAGAGATCTGGAGGAAT  
 ACCGGTGGCGAAGGCGGCCCTGGACTTAGACTGACGCTCAGGTGCGAA  
 AGCGTGGGGAGCAAACAGGATTAGATACCCTGGTAGTCCACGCCGTAAAC  
 GATGTCTACTTGGAGGTTGTGCCCTTGAGGCGTGGCTTCCGGAGCCAACG  
 CGTTAAGTAGACCGCCTGGGGAGTACGGCCGCAAGGTTAAAACCTCAAATG  
 AATTGACGGGGGCCCGCACAAAGCGGTGGAGCATGTGGTTTAAATTTCGATGC  
 AACGCGAAGAACCTTACCTGGTCTTGACATCCACAGAAGTTTGCAGAGAT  
 GCGAATGTGCCTTCGGGAACCTGTGAGACAGGTGCTGCATGGCTGTCGTCA  
 GCTCGTGTGTGAAATGTTGGGTTAAGTCGGGCAACGAGCGCAACCCTTA  
 TCCTTTGTTGCCAGCGGTCCCCCGGGGACACGGGGATGACGGCCTGACT  
 TAAAGGGGATTAAGGCGGGGATTAGATCTTGTATCATCCCCTTTACGAC  
 CAGAGCTACACACGTGCGACAATGGCGCATACAAAGAGAAGCGACCTCGC  
 GAGAGCAAGCGGACCTCATAAAGTGCCTCGTAGTCTGGACTGGAGTCTGC  
 AACTCGACTCCATGAAGTCGGAATCGCCCGGAATTGTGCATCAGGGTGCC  
 AGGGAGATTAGGAACCGGGGCCTTGTAGACAGGTCCTGTCACAGGATGGG  
 AGTGGGTGCAAAAGAAGTCGGTAGCTTAACCTTCATAGCCCAAAAAGGG  
 CTTTTTGAACATGTCTTGGGTGTTGTGGAAACCCCTAGG

Descriptions

Sequences producing significant alignments:

Select: All None Selected: 0

Alignments Download GenBank Graphics Distance tree of results

| Description                                                                                                    | Max score | Total score | Query cover | E value | Ident | Accession                   |
|----------------------------------------------------------------------------------------------------------------|-----------|-------------|-------------|---------|-------|-----------------------------|
| <a href="#">Salmonella enterica subsp. arizonae strain ATCC 13314 16S ribosomal RNA gene, partial sequence</a> | 2089      | 2089        | 96%         | 0.0     | 93%   | <a href="#">NR_041696.1</a> |
| <a href="#">Salmonella enterica subsp. arizonae strain NCTC7307 genome assembly, chromosome_1</a>              | 2063      | 14221       | 96%         | 0.0     | 93%   | <a href="#">LS483466.1</a>  |
| <a href="#">Salmonella enterica subsp. enterica strain SA20100345, complete genome</a>                         | 2063      | 14022       | 96%         | 0.0     | 93%   | <a href="#">CP022504.1</a>  |
| <a href="#">Salmonella enterica subsp. arizonae serovar 62-z36-str. RKS2983, complete genome</a>               | 2063      | 14197       | 96%         | 0.0     | 93%   | <a href="#">CP006693.1</a>  |

**Fasta sequence of HB11 (Accession# MH985335) alongwith top 4 hits from BLAST.**

>HB11

TGGCGGCAGGCCTAACACATGCAAGTCGAACGGTAACAGGAAGCAGCTTG  
 CTGCTTCGCAGACGAGTCCCGGACGGGTGANTAATGTCTGGGAACTGCC  
 TGATGGAGGGGGATAACTACTGGAAACGGAGGCTGGTACCGCATAACGTC  
 GCAAGACCAAGAGGGGGACCTTCGGGCCTCTTGGGATCAGTTGTGCCCT  
 GATGGGGTTAGCTGGTAGGTGGGGTAACGGCTCACCTAGGCGACGATCCC  
 TAGCTGGTCTGAGAGGATGACCAGCCACACTGGAAGTGGAGACACGGTGGA  
 GACACCTACGGGAGGCAGCAGTGGGGAAATGTTGCACAATGGGCGCAAGCC  
 TGATGCAGCCATGCCGCGTGTATGAAGAAGGCCTTCGGGTTGTAAACTAA  
 GGGCAACAGAGAGGAAGGTGTTGTGGTTAATTTCCGCAGCAATTGACGTT  
 ACCCGCAGAAGTTGCACCGGCTAACTCCGTGCCAGCAGCCGCGGTAATAC  
 GGGGGGTGCAAGCGTTAATCGGGGGTACTGGGCGTAAAGCGCACGCAGGC  
 GGTCTGTCAAGTCGGATGTGAAATCCCCGGGCTCAACCTGGGAACTGCAT  
 TCGAAACTGGCAGGCTTGAAGTCTTGTGGAGGGGGGTAGAATTCCAGGTGT  
 AGCGGTGAAATGCGTAGAGATCTGGAGGAATACCGGTGGCGAAGGCGGGG  
 CCCTGGACAAAGACTGACGCTCAGGTGCGTTTTCGTGGGGAGCAAACAGG  
 ATTAGATACCCTGGTAGTCCACGCCGTAAACGATGTCTACTTGGAGGCTG  
 TGCCCTTGGAGCCGTGGCTTCCGGAGCTAACGCGTTAAGTAGACCGCCTGG

GGAGTACGGCCGCAAGGTAAAACTCGGGTGGGTTGACGGCCCCCGCAG  
 GGGCGGTGGAGCATGTGGTTTAAATTCGATGCAACGCGAAGAACCTTACCT  
 GGTCTTGACATCCACGGAAGGTCTCAGAGATGAGACTGTGCCTTCGGGAG  
 CCGTGAGACAGGTGCTGCATGGCTGTCGTCAGCTCGTGTTGTGAAATGTT  
 GGGTTAAGTCCCGCAACGAGCGCAACCCTTATCCTTTGTTGCCAGCGGTC  
 CGGCCGGGAACTCAAAGGAGACTGCCAGTGATAAACTGGAGGAAGGTGGG  
 GATGACGTCAAGTCATCATGGCCCTTACGACCAGGGCTACACACGTGCTA  
 CAATGGCGCATAAAAGAGAAGCGACCTCGCGAGAGCAAGCGGACCTCAT  
 AAAGTGCCTCGTAGTCCGGATTGGAGTCTGCAACTCGACTCCATGAAGTC  
 GGAATCGCTAGTAATCGTGGATCAGTTTGG

Descriptions

Sequences producing significant alignments:

Select: All None Selected:0

Alignments Download GenBank Graphics Distance tree of results

| Description                                                                                                  | Max score | Total score | Query cover | E value | Ident | Accession                   |
|--------------------------------------------------------------------------------------------------------------|-----------|-------------|-------------|---------|-------|-----------------------------|
| <a href="#">Salmonella enterica subsp. houtenae strain DSM 9221 16S ribosomal RNA gene, partial sequence</a> | 2172      | 2172        | 99%         | 0.0     | 96%   | <a href="#">NR_044371.1</a> |
| <a href="#">Salmonella enterica subsp. indica strain DSM 14848 16S ribosomal RNA gene, partial sequence</a>  | 2097      | 2097        | 99%         | 0.0     | 95%   | <a href="#">NR_044370.1</a> |
| <a href="#">Salmonella enterica subsp. salamae strain DSM 9220 16S ribosomal RNA gene, partial sequence</a>  | 2089      | 2089        | 99%         | 0.0     | 95%   | <a href="#">NR_044372.1</a> |
| <a href="#">Salmonella enterica subsp. enterica strain Ty2 16S ribosomal RNA, partial sequence</a>           | 2084      | 2084        | 99%         | 0.0     | 95%   | <a href="#">NR_074799.1</a> |

**FASTA sequence of CT7 (Accession# MH985332) alongwith top 4 hits from BLAST.**

> CT7

GGCCTCTTGCCTTCAAATGTGCCAGATGGGATTAGCTAGTTGGTGTGGTAACGG  
 CTCCCCAAGGCGACG  
 ATCCCTAGCTGGTCTGAGAGGATGACCAGCCTCTCTGGAAGTCTGAGACACGGTCCA  
 GACTCCTACGGGAGG  
 CAGCAGTGGGGAATATTGCACAATGGGCGCAAGCCTGATGCAGCCATGCAGCGT  
 GTATGAAGAAGGCCTT  
 CGGGTTGTAAAGTACTTTCAGTGGGGTGGAAAGGTGTTGTGGTTAATAACAGCAGC  
 AATTGACGTTACCAG  
 CAGAAGAAGCACCGGCTAACTCCGTGCCTGCAGCCGCGGTAATACGGAGGGTGC  
 AAGCGTTAATCGGAAT  
 TACTGGGCGTAAAGCGCCCGCAGGCGGTCTGTCAAGTCGGATGTGAAATCCCCGG  
 GCTCAACCTGGGAAC  
 TGCATTCGAAACTGGCAGGCTTGAGTCTTGTAGAGGGGGGTAGAATTCCAGGTGT  
 AGCGGTGAAATGCGT  
 AAAGATCTGGAGGAATACCGGTGGTGAAGGCGGCCCCCTGGACAAAACTGACG  
 CTCAGGTGCGAAAGCG  
 TGGGGAGCAAACAGGATTAGATACCCTGGTAGTCCCCGCCGTAAACGATGTCTAC  
 TTGGAGGTTGTGCC  
 TTGAGGTGTGGCTTCCGGAGCTAACGTGTTAAGTAGACCGCCTGGGGAGTACGGC  
 CGCAAGGTTAAAACT  
 CAAATGAATTGACGGGGCCCGCCAAGTGGTGGAGCATGTGGTTTAAATTCGATG  
 CAACGCGAAGAACCT  
 TACCTGGTCTTGACATCCACAGAACTTCCAGAGATGGATTGGTGCCTTCGGGAA  
 CTGTGAGACAGGTGC  
 TGCATGGCTGTCGTCAGCTCGTGTTGTGAAATGTTGGGTTAAGTCCCGCAACGAG  
 CGCAACCCTTATCCT  
 TTGTTGCCTGTGATTAGGTCGGGAACTCAAAGGAACTGCCAGTGATAAACTGGA  
 GGAAGGTGGGGATGA



CGTCAAGTCATCATGGCCCTTACGACCAGGGCTACACACGTGCTACAATGGCGCA  
TACAAAAAGAAGCGA  
CCTCGTATGAGCAAGTGGACCTCATAAAGTGTGTCGTAGTCCGGATTGGAGTCTG  
CAACTCGACTCCTTG  
AAGTCGGAATCGCTAGTAATCGTGGATCAAATGCCACGGTGAATACGTTCCCGG  
GCCTTGTACACACCG  
CCCGTCTCCCCTTGGGAGTGGGTTGCAAAGAAGTAGGTAGCTTAACCTTCGGGA  
GGGGGCTTACCCCTTTG

Descriptions

Sequences producing significant alignments:

Select: [All](#) [None](#) Selected: 0

Alignments Download GenBank Graphics Distance tree of results

| Description                                                                                                                                                 | Max score | Total score | Query cover | E value | Ident | Accession                   |
|-------------------------------------------------------------------------------------------------------------------------------------------------------------|-----------|-------------|-------------|---------|-------|-----------------------------|
| <input type="checkbox"/> <a href="#">Salmonella enterica subsp. enterica serovar Typhimurium strain ATCC 13311 16S ribosomal RNA gene, partial sequence</a> | 2145      | 2145        | 100%        | 0.0     | 97%   | <a href="#">NR_116126.1</a> |
| <input type="checkbox"/> <a href="#">Salmonella enterica subsp. enterica strain LT2 16S ribosomal RNA, partial sequence</a>                                 | 2134      | 2134        | 100%        | 0.0     | 97%   | <a href="#">NR_074910.1</a> |
| <input type="checkbox"/> <a href="#">Salmonella enterica subsp. enterica strain LT2 16S ribosomal RNA gene, partial sequence</a>                            | 2124      | 2124        | 100%        | 0.0     | 97%   | <a href="#">NR_104709.1</a> |
| <input type="checkbox"/> <a href="#">Salmonella enterica subsp. enterica strain Ty2 16S ribosomal RNA, partial sequence</a>                                 | 2111      | 2111        | 100%        | 0.0     | 97%   | <a href="#">NR_074799.1</a> |

**FASTA sequence of SP6 (Accession #MH985331) alongwith top 4 hits from BLAST.**

>SP6

TACTCGAGCTCCATGCAATCAACGGTAAGTGGAAAGCACTTGCTGCTTTGC  
TGACGAGTGGCGGACGGGTGAGTAGTGTCTGGGAAACTGCCTGATGGAGG  
GGGATAACTACTGGAACGGTGGCTAATACCGCATAACGTCGCAAGACCA  
AAGAGGGGGACCTTCGGGCCTCTTGCCATCATATGTGCCCATATGGGATT  
ATCTTGTTGGTGAAGTAACGGCTCACCAGGGCGACGATCCCTATCTGGTC  
TGAGAGGATGACCACCCACACTGGAAGTACACACGGTCCACACTCCTAC  
GGGAGGCAGCAGTGGGGAATATTGCACAGTGGGCGCAAGCCTGATGCACC  
CATGCCGCGTGTATGAAAAGGCCTTCGGGTTGTAAAGTACTTTCAGCGG  
GGAAGAAGGTGTTGTGGTTAATAACCGCAGCAATTGACGTTACCCGCAA  
AAAAGCACCGGCTAACTCCGTGCCAGCACCCGCGGTAATACAGAGGGTGC  
AAGCGTTAATCGGAATTACTGGGCGTAGAGCGCACGCACGCGGTCTGTCA  
AGTCAGATGTGAAATCCCCGGGCTAACCTGAGAACTGCATTCGAAACTG  
GCTGGCTTGAGTCTTGTAGAGGGGGGTAGAATTCCGGGTGTAGCGGTGAA  
ATGCGTAGAGATCTGGAAGAATACCGGTGGCGAGCGCGGCCCCCTGCAC  
AAGACTGACGCTCATGTGCGAAGCGTGGAGAGCAACGGGATTAGATACCC  
TGATACTCCACGCCGTAACGATGTCTACTGAGTGTGCCGTGAAGGCGTC  
CTCGGAGCTACGCGTTAAGTACACCCGTCTGAGAGTACGGACCGCG

Descriptions

Sequences producing significant alignments:

Select: [All](#) [None](#) Selected: 0

Alignments Download GenBank Graphics Distance tree of results

| Description                                                                                                                                           | Max score | Total score | Query cover | E value | Ident | Accession                  |
|-------------------------------------------------------------------------------------------------------------------------------------------------------|-----------|-------------|-------------|---------|-------|----------------------------|
| <input type="checkbox"/> <a href="#">Salmonella enterica subsp. enterica serovar Dublin strain DSPV 595T 16S ribosomal RNA gene, partial sequence</a> | 1240      | 1240        | 99%         | 0.0     | 93%   | <a href="#">FJ997268.1</a> |
| <input type="checkbox"/> <a href="#">Uncultured bacterium clone 16saw/25-2d10 p1k 16S ribosomal RNA gene, partial sequence</a>                        | 1240      | 1240        | 98%         | 0.0     | 93%   | <a href="#">EF605231.1</a> |
| <input type="checkbox"/> <a href="#">Salmonella enterica subsp. enterica serovar Gaminara str. SA20063285 chromosome, complete genome</a>             | 1236      | 8644        | 98%         | 0.0     | 93%   | <a href="#">CP030288.1</a> |
| <input type="checkbox"/> <a href="#">Salmonella enterica subsp. enterica serovar Milwaukee str. SA19950795 chromosome, complete genome</a>            | 1236      | 8554        | 98%         | 0.0     | 93%   | <a href="#">CP030175.1</a> |

**Fasta sequence of PB2 (Accession# MH985338) alongwith top 4 hits from BLAST.**

>PB2

AAATTGAAGAGTTTGATCCTGGCTCAGATTGAACGCTGGCGGCAGGCCTA  
ACACATGCAAGTCGAACGGTAACAGGAAGCAGCTTGCTGCTTTGCTGACG  
AGTGGCGGACGGGTGAGTAATGTCTGGGAAACTGCCTGATGGAGGGGGAT

AACTACTGGAAACGGTGGCTAATACCGCATAACGTCGCAAGACCAAAGAG  
GGGGACCTTCCCGCCACAAGCCAGCACATCTCGGCTGATCCCATTACCAA  
GTTGGTGAGGTAACGGCTCACCAAGGCGACGATCCCTAGCTGGTCTGAGA  
GGATGACCAGCCACACTGGTCTGAGACACGGTCCAGACTCCTACGGGAG  
GCAGCAGTGGGGAATATTGCACAATTGGGGGAAAAATGATGCAGGGATGG  
GGCGTGTATGAAGAAGGCCCTTCGGGTTGTAAGTACTTTCAGCGGGGAGG  
AAGGTGTTGTGGTTAATAACCGCAGCAATTGACGTTACCCGCAGAAGAAG  
CACCGGCTAACTCCGTGCCAGCAGCCGCGGTAATACGGAGGGGTGCAAGCG  
TTAATCGGAATTACTGGGCGTAAAGCGCACGCAGGCGGTCTGTCAAGTCG  
GATGTGAAATCCCCGGGCTCAACCTGGGAACTGCATTTCGAAACTGGCAGG  
CTTGAGTCTTGTAGAGGGGGGTAGAATTCCAGGTGTAGCGGTGAAATGCG  
TAGAGATCTGGAGGAATACCGGTGGGGCGAAGGCGGCCCCCTGGACAAAG  
ACTGACGCTCAGGTGCGAAAGCGTGGGGAGCAAACAGGATTAGATACCCT  
GGTAGTCCACGCCGTAACGATGTCTACTTGGAGGTTGTGCCCTTGAGAG  
CGTGGCTTCCGGAGCTAACGCGTTAAGTAGACCGCCATGACAGTACGGCC  
GCAAGGTTAAAACCTCAAATGAATTGACGGGGGCCCGCACAAGCGGTGGAG  
CATGTGATCCGATTTCGATGCAACGCGAAGAACCTTACCTGGTCTTGACAT  
CCACGGAAGTTTTTCAGAGATGAGAATGTGCCTTCGGGAACCGTGAGACAG  
TGCTGCATGGCTGTTCGTCAGCTCGTGTGTGAAATGTTGGGTAAAGTTC  
GCAACGAGCGCAACCCTTATCCTTTGTTGCCAGCGGTCCGGCCGGGAACT  
CAAAGGAGACTGCCAGTGATAAACTGGAGGAAGGTGGGGAATCGCAGGTA  
C

| Description                                                                                                    | Max score | Total score | Query cover | E value | Ident | Accession                  |
|----------------------------------------------------------------------------------------------------------------|-----------|-------------|-------------|---------|-------|----------------------------|
| <a href="#">Salmonella.gallinarum 16S ribosomal RNA gene, partial sequence</a>                                 | 2004      | 2004        | 99%         | 0.0     | 97%   | <a href="#">AF057360.1</a> |
| <a href="#">Salmonella enterica subsp. enterica serovar Anatum strain R16.0676 chromosome, complete genome</a> | 1958      | 13318       | 99%         | 0.0     | 96%   | <a href="#">CP029800.1</a> |
| <a href="#">Salmonella enterica subsp. enterica serovar Anatum str. USDA-ARS-USMARC-1765, complete genome</a>  | 1958      | 13377       | 99%         | 0.0     | 96%   | <a href="#">CP014659.2</a> |
| <a href="#">Salmonella enterica subsp. enterica serovar Anatum str. USDA-ARS-USMARC-1781, complete genome</a>  | 1958      | 13294       | 99%         | 0.0     | 96%   | <a href="#">CP014666.2</a> |

**Fasta sequence of PB9 (Accession# MH985340) alongwith top 4 hits from BLAST.**  
>PB9

AAATTGAAGAGTTTGATCATGGCTCAGATTGAACGCTGGCGGCAGGCCTA  
ACACATGCAAGTCGAACGGTAACAGGAAGCAGCTTGCTGCTTTGCTGACG  
AGTGGCGGACGGGTGAGTAATGTCTGGGAAACTGCCTGATGGACGCGGAT  
AACTACTGGAAACGGTGGCTAATACCGCATAACGTCGCAAGACCAAAGAG  
GGGGACCTTCCGGCCTCTTGCCATCAGATGTGCCAGATGGGATTAGCTT  
GTTGGTGAGGTAACGGCTCACCAAGGCGACGATCCCTTCCTGGTCTGAGA  
GGATGACCAGCCACACTGGAAGTGAAGACACGGTCCAGACTCCTACGGGAG  
GCAGCAGTGGGGAATATTGCACAATGGGCGCAAGCCTGATGCAGCCATGC  
CGCGTGTATGAAGAAGGCCCTTCGGGTTGTAAGTACTTTCAGCGGGGAGG  
AAGGTGTTGTGGTTAATAACCGCAGCAATTGACGTTACCCGCAGAAGAAG  
CACCGGCAAACGCCGTGCCTGCAGCCGCGGTAATACGGAGGGGTGCAAGCG  
TTAATCGGAATTACTGGGCGTAAAGCGCACGCAGGCGGTCTGTCAAGTCG  
GATGTGAAATCCCCGGGCTCAACCTGGGAACTGCATTTCGAAACTGGCAGG  
CTTGAGTCTTGTAGAGGGGGGTAGAATTCCAGGTGTAGCGGTGAAATGCG  
TAGAGATCTGGAGGAATACCGGTGGCGAAGGCGGCCCCCTGGACAAAGAC  
TGACGCTCAGGTGCGAAAGCGTGGGGAGCAAACAGGATTAGATACCCTGG  
TAGTCCACGCCGTAACGATGTCTACTTGGAGGTTGTGCCCTTGAGGCGT  
GGCTTCCGGAGCTAACGCGTTAAGTAGACCGCCTGGGGAGTACGGCCGCA

AGGTTAAACTCAAATGAATTGACGGGGGCCCGCACAAGCGGTGGAGCAT  
 GTGGTTTAATTCGATGCAACGCGAAGAACCTTACCTGGTCTTGACATCCA  
 CGGAAGTTTTTCAGAGATGAGAATGGTGCCTTCGGGAACCGTGAGACAGGT  
 GCTGCATGGCTGTCGTCAGCTCGTGTGTTGTGGGGTGTTCCTTAAGTGGGG  
 CTTCGAGCGCAACCCTTATCCTTTGTTGCCAGCGGTCCGGCCGGGAACTC  
 AAAGGAGACTGCCAGTGATAAACTGGAGGAAGGTGGGGATGACGTCAAGT  
 CATCATGGCCCTTACGACCAGGGCTACACACGTGCTACAATGGCGCATAAC  
 AAAGAGAAGCGCCACGCGTGTGCGAGGGGAGGTCATGGGGTACGACGCA  
 GGCCGGAAAGGGGTCGGCAACTCGACTCCAGGAAGTCGGAATCGCTAGTA  
 ATCGTGGATCAGAATGCCACGGTGAATACGTTCCCGGGCCTTGTACACAC  
 CGCCCGTCACACCATGGGAGTGGGTTGCAAAGAAGTAGGTAGCTTAACC  
 TTCGGGAGGGCGCTTACCACCTTTGTGATTCATGACTGGGGTGAAGTCGTA  
 ACAAGGTAACCGTAGGGGAACCTGCGGTTGGATCACCTCCTTACCTT

Descriptions

Sequences producing significant alignments:

Select: All None Selected: 0

Alignments Download GenBank Graphics Distance tree of results

| Description                                                                                                                               | Max score | Total score | Query cover | E value | Ident | Accession                  |
|-------------------------------------------------------------------------------------------------------------------------------------------|-----------|-------------|-------------|---------|-------|----------------------------|
| <input type="checkbox"/> <a href="#">Salmonella paratyphi strain A3 16S ribosomal RNA gene, partial sequence</a>                          | 2647      | 2647        | 100%        | 0.0     | 98%   | <a href="#">EU118078.1</a> |
| <input type="checkbox"/> <a href="#">Salmonella paratyphi strain A5 16S ribosomal RNA gene, partial sequence</a>                          | 2641      | 2641        | 100%        | 0.0     | 97%   | <a href="#">EU118080.1</a> |
| <input type="checkbox"/> <a href="#">Salmonella enterica subsp. enterica serovar Gaminara str. SA20063285 chromosome, complete genome</a> | 2639      | 18317       | 100%        | 0.0     | 97%   | <a href="#">CP030288.1</a> |
| <input type="checkbox"/> <a href="#">Salmonella enterica strain SA20041606 chromosome</a>                                                 | 2639      | 18151       | 100%        | 0.0     | 97%   | <a href="#">CP030236.1</a> |

**Fasta sequence of HE13 (Accession# MH985333) alongiwth top 4 hits from BLAST.**

>HE13

ATTGAACGCTGGTGGCAGGCCTAACACATGCAAGTCGAACGGTAACAGGA  
 AACAGCTTGCTGCTTCGCTGACGAGTGGCGACCGGGTGAGTAATGTCTGG  
 GAAACTGCCTGATGGAGGGGGATAACTACTGGAAACGGTGGCTAATACAG  
 CATAACGTCGCAAGACCAAAGAGGGGGACCTTCGGGCCTCTTGCCATCAG  
 ATGTGCCAGATGGGATTAGCTTGTGGTGAGGTAACGGCTCACCAAGGC  
 GACGATCCCTAGCTGGTCTGAGAGGATGACCAGCCACACTGGAAGTGA  
 CACGGTCCAGACTCCTACGGGAGGCAGCAGTGGGGAATATTGCACAATGG  
 GCGCAAGCCTGATGCAGCCATGCCGCGTGTATGAAGAAGGCCTTCGGGTT  
 GTAAAGTACTTTCAGCGGGGAGCAAGGTGTTGTGGTTAATAACCGCAGCA  
 ATTGAAGTTACCCGCAGAAGAAGCACC GGCTAACTCCGTGCCAACACAG  
 CGGTAATAAGGAGGGTGCAATTGTTAATCGGAATTACTGGGCGTAAAGCG  
 CACGCAGGCGGTCTGTCAAGTCGGATGTGAAATCCCCGGGCTCAACCTGG  
 GAACTGCATTTCGAAACTGGCAGGCTTGAGTCTTGTAGAGGGGGGTAGAAT  
 TCCAGGTGTAGCGGTGAAATGCGTAGAGATCTGGAGGAATACCGGTGGCG  
 AAGGCGGCCCCCTGGACAAAGACTGACGCTCAGGTGCGAAAGCGTGGGGA  
 GCAAACAGGATTAGATACCCTGGTAGTCCAAGCCGTAACGATGTCTACT  
 TGCAGGTTGTGCCCTTGAGGCGTGGCTTCCGGAGCTAACGCGTTAAGTAG  
 ACCGCTGGGCAGTACGGCAGCAAGGTTAAAACTCAAATGAATTGACGGG  
 GGCCAGCACAATGGTGCAGCATGTGGTTTAATTCGATGCAAAGCGAAGA  
 ACCTTACCTGGTCTTGACATCCACAGAANNNTCCAGAGATGAATTNGTGC  
 CTTCGGGAACTGTGAGACAGGTGCTGCATGGCTGTCGTCAACTCGTGTG  
 TGAAATGTTGGGTTAAGTCCAACAAAGAGCGCAACCCTTATCCTTTGTTG  
 CCAACGATTAGGTGGGGAAGTCAAAGGAGACTGCCAGTGATAAACTGCAG  
 CAAGGTGGGGATGACGTCAAGTCATCATGGCCCTTAAGACCAGGGCTACA  
 CAAGTGCTACAATGGTGCATACAAAGAGAATTGACCTCGCGAGAGCAAGC

GCACCTCATAAAGTGCGTCGTAGTCCGCATTGGAGTCTGCAACTCGACTC  
 CATGAAGTAGGAATCGCTAGTAATCGTGCATCAGGGTGCCAAGGTGAATA  
 AGTTGGGGGGCCTTGTACACACCGCCCGTCACACCATGGCAGTGGGTTGC  
 AAAAGAAGTAGGTAGCTTAACCTTGGGCAGGGCGCTTACCACTTTGTGAT  
 TCATGACTGGGGTGAAG

**Descriptions**

Sequences producing significant alignments:

Select: [All](#) [None](#) Selected: 0

[Alignments](#) [Download](#) [GenBank](#) [Graphics](#) [Distance tree of results](#)

|                          | Description                                                                                               | Max score | Total score | Query cover | E value | Ident | Accession                   |
|--------------------------|-----------------------------------------------------------------------------------------------------------|-----------|-------------|-------------|---------|-------|-----------------------------|
| <input type="checkbox"/> | <a href="#">Salmonella enterica subsp. enterica strain LT2 16S ribosomal RNA, partial sequence</a>        | 2418      | 2418        | 100%        | 0.0     | 97%   | <a href="#">NR_104709.1</a> |
| <input type="checkbox"/> | <a href="#">Salmonella enterica subsp. enterica strain LT2 16S ribosomal RNA, partial sequence</a>        | 2401      | 2401        | 100%        | 0.0     | 96%   | <a href="#">NR_074910.1</a> |
| <input type="checkbox"/> | <a href="#">Salmonella enterica subsp. enterica strain Ty2 16S ribosomal RNA, partial sequence</a>        | 2385      | 2385        | 100%        | 0.0     | 96%   | <a href="#">NR_074799.1</a> |
| <input type="checkbox"/> | <a href="#">Salmonella enterica subsp. enterica strain ATCC 13311 16S ribosomal RNA, partial sequence</a> | 2375      | 2375        | 100%        | 0.0     | 96%   | <a href="#">NR_119108.1</a> |

## Appendix E

### Results of safety test for HB1 antigen (0.5 ml) in Group SR1, 7 days post oral immunization.

| Type of antigen  | Post immunization Hours | Results based on the average of readings of 5 rabbits |                          |                   |              |        |                                |
|------------------|-------------------------|-------------------------------------------------------|--------------------------|-------------------|--------------|--------|--------------------------------|
|                  |                         | Physical abnormalities                                | Average Body temperature | Daily food intake | Water intake | Weight | Recovery of HB1 antigen CFU/ml |
| HB1 live antigen | 24                      | None                                                  | 102.9                    | Normal            | Normal       | Normal | $1 \times 10^3$                |
|                  | 48                      | -                                                     | 102.5                    | Dropped           | Dropped      | Normal | $1 \times 10^4$                |
|                  | 72                      | -                                                     | 103.1                    | Normal            | Normal       | Normal | $1 \times 10^4$                |
|                  | 96                      | -                                                     | 102.5                    | Normal            | Normal       | Normal | $1 \times 10^5$                |
|                  | 120                     | -                                                     | 103.1                    | Normal            | Normal       | Normal | $1 \times 10^5$                |
|                  | 144                     | -                                                     | 101.6                    | Normal            | Normal       | Normal | $1 \times 10^4$                |
|                  | 168                     | -                                                     | 102.2                    | Normal            | Normal       | Normal | $1 \times 10^4$                |

### Results of Safety test for HB1 antigen (1ml) in Group SR2 7 days post oral immunization.

| Type of antigen  | Post immunization hours | Results based on the average of readings of 5 rabbits |                          |             |              |                   |                                |
|------------------|-------------------------|-------------------------------------------------------|--------------------------|-------------|--------------|-------------------|--------------------------------|
|                  |                         | Physical abnormalities                                | Average Body Temperature | Food intake | Water Intake | Changes in weight | Recovery of HB1 antigen CFU/ml |
| HB1 live antigen | 24                      | None                                                  | 103.2                    | Normal      | Normal       | Normal            | $1 \times 10^6$                |
|                  | 48                      | -                                                     | 102.9                    | Normal      | Normal       | Normal            | $1 \times 10^8$                |
|                  | 72                      | -                                                     | 102.5                    | Normal      | Normal       | Normal            | $1 \times 10^8$                |
|                  | 96                      | -                                                     | 102.7                    | Normal      | Normal       | Normal            | $1 \times 10^7$                |
|                  | 120                     | -                                                     | 102.1                    | Normal      | Normal       | Normal            | $1 \times 10^7$                |
|                  | 144                     | -                                                     | 101.9                    | Normal      | Normal       | Normal            | $1 \times 10^6$                |
|                  | 168                     | -                                                     | 102.5                    | Normal      | Normal       | Normal            | $1 \times 10^7$                |

### Results of Safety test for control group of rabbits given normal saline 0.5ml.

| Type of antigen  | Post vaccination Hours | Results based on the average of readings obtained from of the 5 rabbits |                          |             |              |                   |                                |
|------------------|------------------------|-------------------------------------------------------------------------|--------------------------|-------------|--------------|-------------------|--------------------------------|
|                  |                        | Physical abnormalities                                                  | Average Body Temperature | Food intake | Water Intake | Changes in weight | Recovery of HB1 antigen CFU/ml |
| HB1 live antigen | 24                     | None                                                                    | 100.7                    | Normal      | Normal       | Normal            | -                              |
|                  | 48                     | -                                                                       | 102.0                    | Normal      | Normal       | Normal            | -                              |
|                  | 72                     | -                                                                       | 102.1                    | Normal      | Normal       | Normal            | -                              |
|                  | 96                     | -                                                                       | 102.5                    | Normal      | Normal       | Normal            | -                              |
|                  | 120                    | -                                                                       | 102.3                    | Normal      | Normal       | Normal            | -                              |
|                  | 144                    | -                                                                       | 102.4                    | Normal      | Normal       | Normal            | -                              |
|                  | 168                    | -                                                                       | 102.3                    | Normal      | Normal       | Normal            | -                              |

## Appendix F

Results of IHA antibody titers in the four groups of immunized rabbits.

| Sampling post vaccination days | Indirect hemagglutination titer in the four group of rabbits |       |       |    |
|--------------------------------|--------------------------------------------------------------|-------|-------|----|
|                                | R1                                                           | R2    | R3    | R4 |
| Day 10                         | 1:16                                                         | 1:8   | 1:8   | -  |
|                                | 1:4                                                          | 1:16  | 1:16  | -  |
|                                | 1:8                                                          | 1:16  | 1:16  | -  |
|                                | 1:8                                                          | 1:32  | 1:32  | -  |
|                                | 1:16                                                         | 1:8   | 1:8   | -  |
|                                | 1:16                                                         | 1:8   | 1:8   | -  |
|                                | 1:8                                                          | 1:8   | 1:8   | -  |
|                                | 1:8                                                          | 1:8   | 1:8   | -  |
|                                | 1:4                                                          | 1:16  | 1:16  | -  |
|                                | 1:16                                                         | 1:16  | 1:16  | -  |
| Day 20                         | 1:32                                                         | 1:64  | 1:32  | -  |
|                                | 1:16                                                         | 1:32  | 1:32  | -  |
|                                | 1:8                                                          | 1:32  | 1:32  | -  |
|                                | 1:16                                                         | 1:32  | 1:32  | -  |
|                                | 1:16                                                         | 1:64  | 1:16  | -  |
|                                | 1:32                                                         | 1:32  | 1:32  | -  |
|                                | 1:32                                                         | 1:32  | 1:32  | -  |
|                                | 1:16                                                         | 1:16  | 1:32  | -  |
|                                | 1:8                                                          | 1:128 | 1:16  | -  |
|                                | 1:16                                                         | 1:64  | 1:32  | -  |
| Day 30                         | 1:64                                                         | 1:128 | 1:16  | -  |
|                                | 1:64                                                         | 1:64  | 1:32  | -  |
|                                | 1:16                                                         | 1:64  | 1:64  | -  |
|                                | 1:8                                                          | 1:64  | 1:64  | -  |
|                                | 1:32                                                         | 1:256 | 1:32  | -  |
|                                | 1:64                                                         | 1:128 | 1:32  | -  |
|                                | 1:32                                                         | 1:64  | 1:64  | -  |
|                                | 1:32                                                         | 1:64  | 1:64  | -  |
|                                | 1:32                                                         | 1:128 | 1:64  | -  |
|                                | 1:64                                                         | 1:64  | 1:64  | -  |
| Day 40                         | 1:128                                                        | 1:512 | 1:64  | -  |
|                                | 1:64                                                         | 1:256 | 1:128 | -  |
|                                | 1:32                                                         | 1:64  | 1:256 | -  |
|                                | 1:32                                                         | 1:64  | 1:128 | -  |
|                                | 1:64                                                         | 1:256 | 1:32  | -  |
|                                | 1:64                                                         | 1:64  | 1:64  | -  |
|                                | 1:128                                                        | 1:64  | 1:128 | -  |
|                                | 1:64                                                         | 1:64  | 1:256 | -  |
|                                | 1:32                                                         | 1:256 | 1:256 | -  |
|                                | 1:128                                                        | 1:64  | 1:128 | -  |
| Day 50                         | 1:256                                                        | 1:64  | 1:128 | -  |
|                                | 1:128                                                        | 1:64  | 1:64  | -  |
|                                | 1:64                                                         | 1:32  | 1:128 | -  |
|                                | 1:32                                                         | 1:32  | 1:64  | -  |
|                                | 1:64                                                         | 1:64  | 1:64  | -  |
|                                | 1:32                                                         | 1:32  | 1:64  | -  |
|                                | 1:128                                                        | 1:64  | 1:128 | -  |
|                                | 1:64                                                         | 1:32  | 1:128 | -  |

|        |       |       |       |   |
|--------|-------|-------|-------|---|
|        | 1:32  | 1:128 | 1:128 | - |
|        | 1:128 | 1:32  | 1:16  | - |
| Day 60 | 1:64  | 1:32  | 1:8   | - |
|        | 1:32  | 1:64  | 1:4   | - |
|        | 1:16  | 1:16  | 1:8   | - |
|        | 1:32  | 1:64  | 1:16  | - |
|        | 1:8   | 1:32  | 1:16  | - |
|        | 1:16  | 1:16  | 1:4   | - |
|        | 1:64  | 1:16  | 1:4   | - |
|        | 1:16  | 1:8   | 1:16  | - |
|        | 1:32  | 1:64  | 1:32  | - |
|        | 1:128 | 1:32  | 1:8   | - |
| Day 70 | 1:4   | 1:16  | 1:4   | - |
|        | 1:4   | 1:4   | 1:2   | - |
|        | 1:16  | 1:8   | 1:4   | - |
|        | 1:8   | 1:4   | 1:4   | - |
|        | 1:2   | 1:8   | 1:8   | - |
|        | 1:4   | 1:2   | -     | - |
|        | 1:8   | -     | 1:4   | - |
|        | -     | 1:4   | 1:8   | - |
|        | 1:4   | 1:4   | -     | - |
|        | 1:32  | 1:32  | 1:16  | - |
